# Supplementary material
Source: Springer Nature journal article supplement (https://www.springermedizin.de/resource/supplementary/13012_2013_733_MOESM2_ESM.pdf/9630560)
Supplement: MOESM2 [file 9630560]

**Figure 1: Study design**

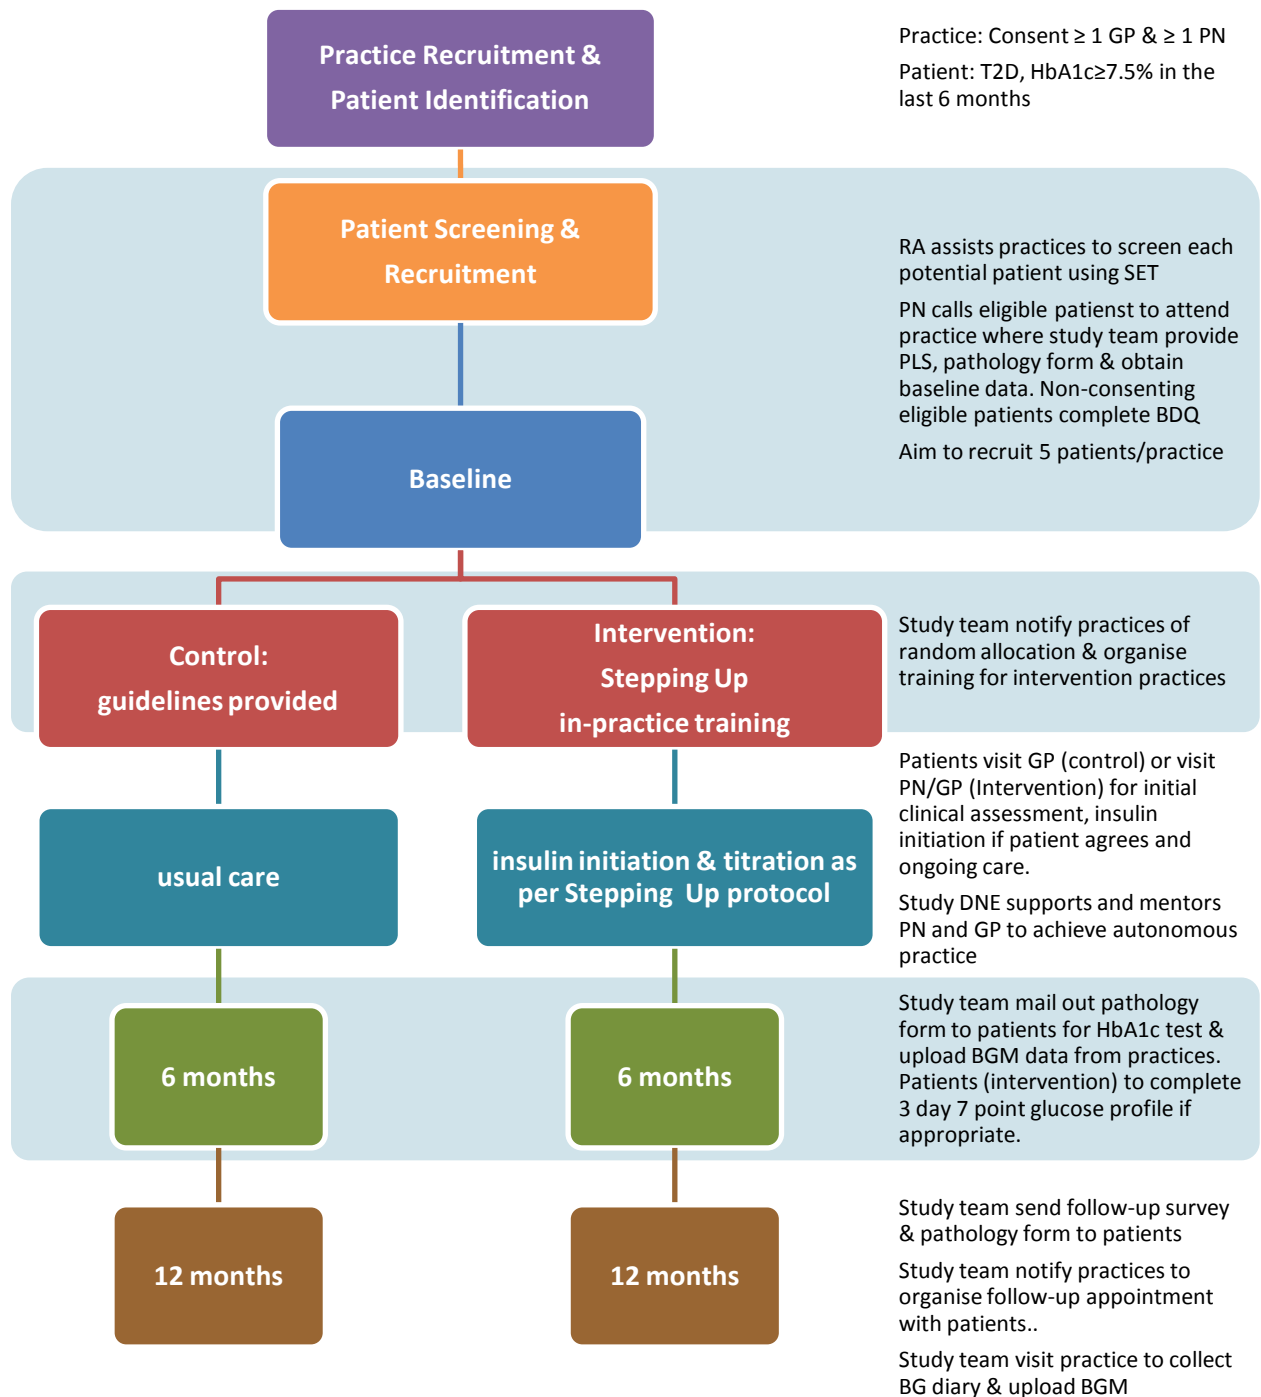

**Legend**

- T2D= Type 2 Diabetes
- RA= Research Assistant
- SET = Screening Eligibility Tool
- PLS = Plain Language Statement
- BDQ = Brief Demographic Questionnaire
- BG= Blood Glucose
- BGM = Blood Glucose Meter
- GP = General Practitioner
- PN = Practice Nurse
- DNE = Diabetes Nurse Educator
